# Supplementary material for: Absolute asymmetric synthesis by nucleophilic carbonyl addition using chiral crystals of achiral amides
Source: Royal Society of Chemistry journal article supplement (doi:10.1039/b315729f), 2004-01-01

## Supporting Information

### Absolute Asymmetric Synthesis by Nucleophilic Carbonyl Addition using Chiral Crystals of Achiral Amides

Masami Sakamoto,\* Shuichiro Kobaru, Takashi Mino, and Tsutomu Fujita

Department of Materials Technology, Faculty of Engineering, Chiba University,

Yayoi-cho, Chiba 263-8522, Japan. Fax: 81 43 290 3401; Tel: 81 43 290 3387; E-mail: sakamotom@faculty.chiba-u.jp

Figure S1. X-Ray Crystallographic Data of *N,N*-Dimethyl-2-benzoylbenzamide **1a**

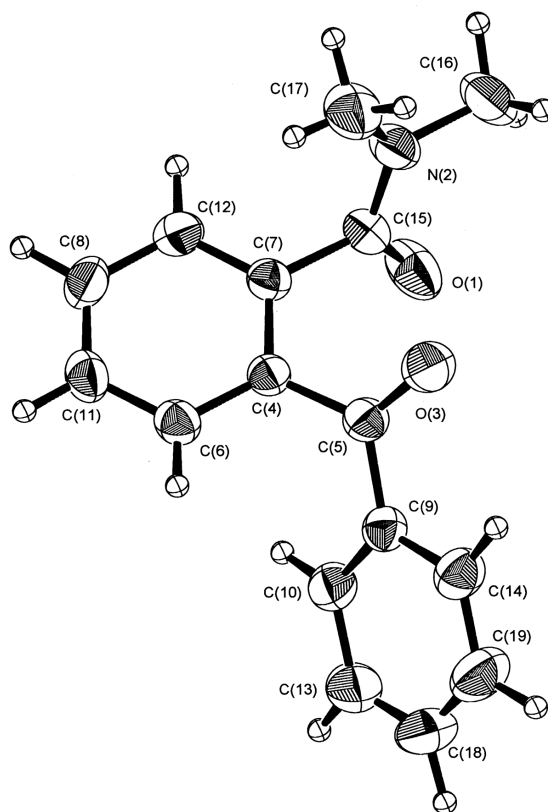

Crystal data of **1a**:  $C_{16}H_{15}NO_2$ ,  $M = 253.301$ , orthorhombic,  $a = 10.420(2)$  Å,  $b = 17.208(4)$  Å,  $c = 7.519(2)$  Å,  $U = 1348.3(6)$  Å<sup>3</sup>,  $T = 293$  K, space group  $P2_12_12_1$  (no. 19),  $Z = 4$ ,  $\mu$  (Cu-K $\alpha$ ) = 0.66 mm<sup>-1</sup>, 1511 reflections measured, 1326 unique ( $R_{int} = 0.046$ ) which were used in all calculations. The final  $wR$  ( $F^2$ ) was 0.151 (all data). The crystallographic data will be sent on quoting the CCDC number CCDC 215659 (e-mail: [deposit@ccdc.cam.ac.uk](mailto:deposit@ccdc.cam.ac.uk)).

Figure S2. X-Ray Crystallographic Data of *N,N*-Diethyl-2-benzoylbenzamide **1b**

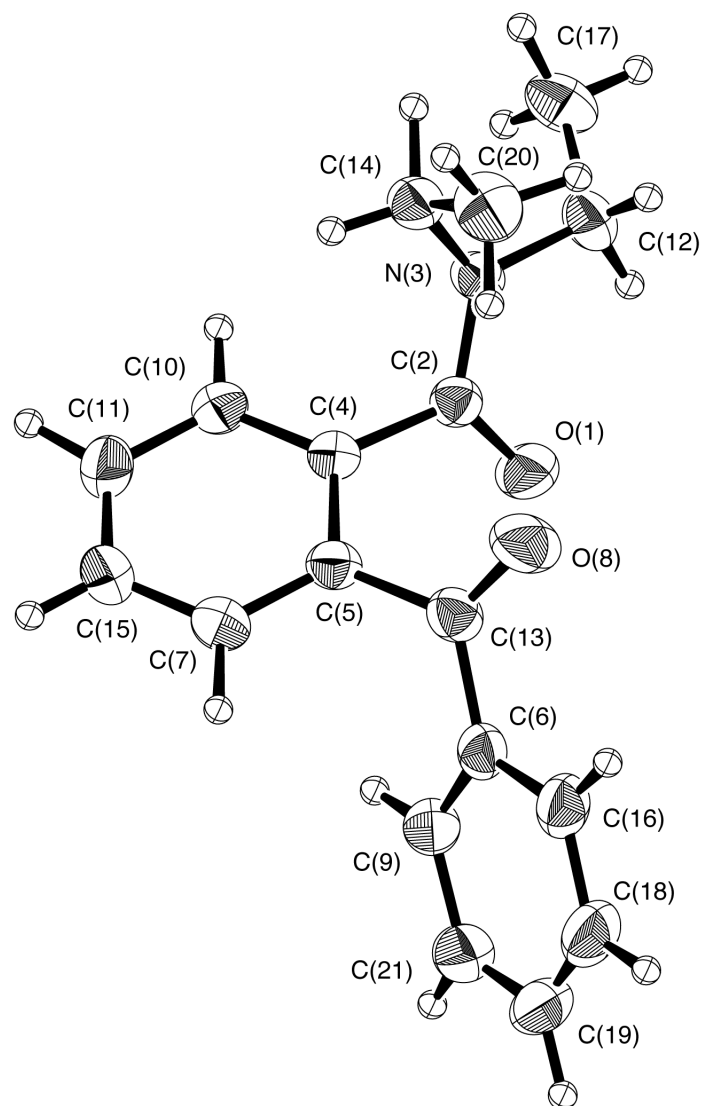

Crystal data of **1b**:  $C_{18}H_{19}NO_2$ ,  $M = 281.355$ , orthorhombic,  $a = 10.937(5) \text{ \AA}$ ,  $b = 13.987(5) \text{ \AA}$ ,  $c = 9.896(4) \text{ \AA}$ ,  $U = 1513.8(10) \text{ \AA}^3$ ,  $T = 293 \text{ K}$ , space group  $P2_12_12_1$  (no. 19),  $Z = 4$ ,  $\mu$  (Cu-K $\alpha$ ) =  $0.64 \text{ mm}^{-1}$ , 1655 reflections measured, 1616 unique ( $R_{int} = 0.059$ ) which were used in all calculations. The final  $wR(F^2)$  was 0.346 (all data). The crystallographic data will be sent on quoting the CCDC numbers CCDC 215660.

Figure S3. X-Ray Crystallographic Data of *N*-benzyl-*N*-ethyl-2-benzoylbenzamide **1c**

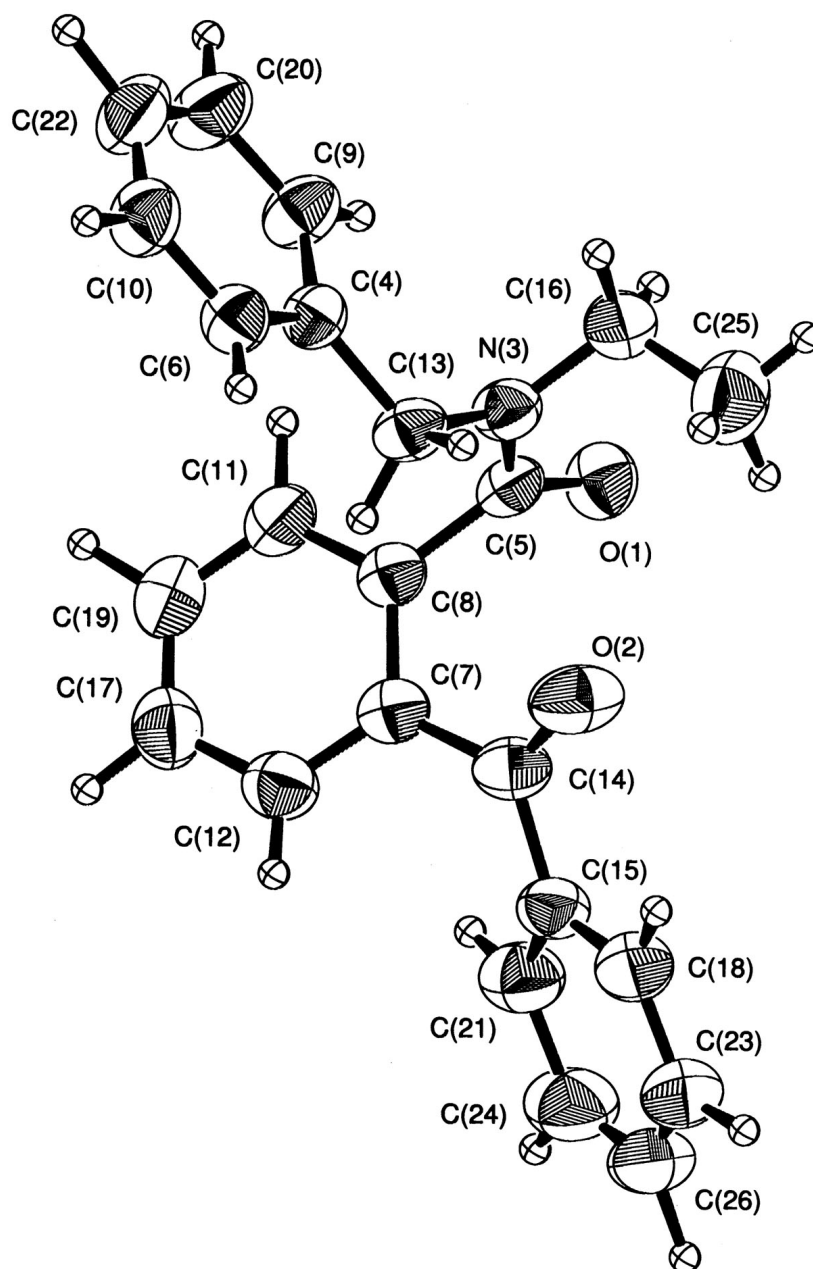

Crystal data of **1c**:  $C_{23}H_{21}NO_2$ ,  $M = 343.426$ , orthorhombic,  $a = 14.384(4) \text{ \AA}$ ,  $b = 16.234(5) \text{ \AA}$ ,  $c = 8.049(4) \text{ \AA}$ ,  $U = 1879.6(12) \text{ \AA}^3$ ,  $T = 293 \text{ K}$ , space group  $P2_12_12_1$  (no. 19),  $Z = 4$ ,  $\mu (\text{Cu-K}\alpha) = 0.61 \text{ mm}^{-1}$ , 2086 reflections measured, 1810 unique ( $R_{int} = 0.037$ ) which were used in all calculations. The final  $wR (F^2)$  was 0.094 (all data). The crystallographic data will be sent on quoting the CCDC numbers CCDC. 215661.

**Figure S4.** X-Ray Crystallographic Data of *N,N*-dibenzyl-2-benzoylbenzamide **1d**

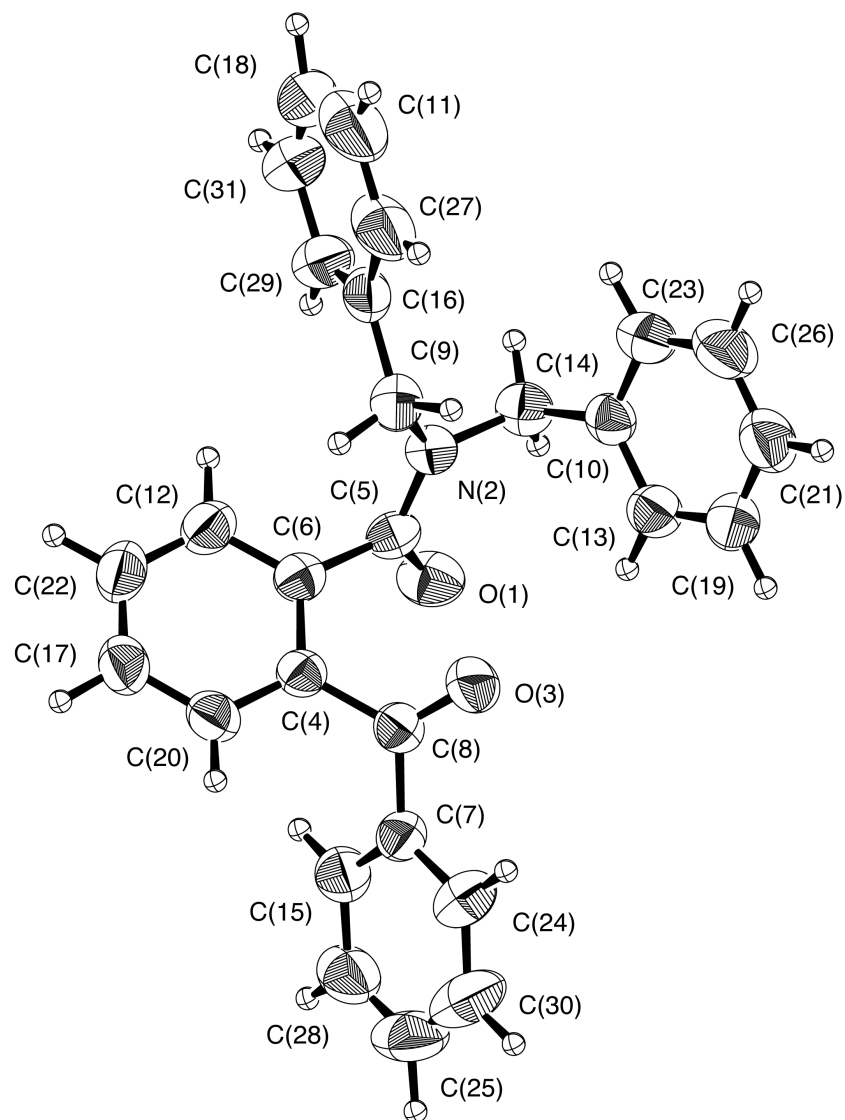

Crystal data of **1d**:  $C_{28}H_{23}NO_2$ ,  $M = 405.497$ , orthorhombic,  $a = 19.753(5) \text{ \AA}$ ,  $b = 22.214(7) \text{ \AA}$ ,  $c = 9.936(3) \text{ \AA}$ ,  $U = 1513.8(10) \text{ \AA}^3$ ,  $T = 293 \text{ K}$ , space group  $P2_12_12_1$  (no. 61),  $Z = 8$ ,  $\mu (\text{Cu-K}\alpha) = 0.61 \text{ mm}^{-1}$ , 4437 reflections measured, 2926 unique ( $R_{int} = 0.050$ ) which were used in all calculations. The final  $wR (F^2)$  was 0.217 (all data). The crystallographic data will be sent on quoting the CCDC numbers CCDC 215662.

### Determination of enantiomeric excesses.

Chemical yields were isolated yields. Enantiomeric excesses were determined on the basis of HPLC analysis using chiralcel-OD column. The traces were shown below.

**Figure S5.** Traces of optically active **2b** (84% ee) obtained by the reaction of **1b** with *n*-butyllithium at  $-80^{\circ}\text{C}$ . (a) Detector: UV-2075 (JASCO), wave-length: 254 nm; column: CHIRALCEL-OD (DAICEL); eluent: hexane: EtOH = 98 : 2; flow rate:  $0.3\text{ ml min}^{-1}$ ; column temp.:  $32.5^{\circ}\text{C}$ . (b) Detector: CD-2095 (JASCO)

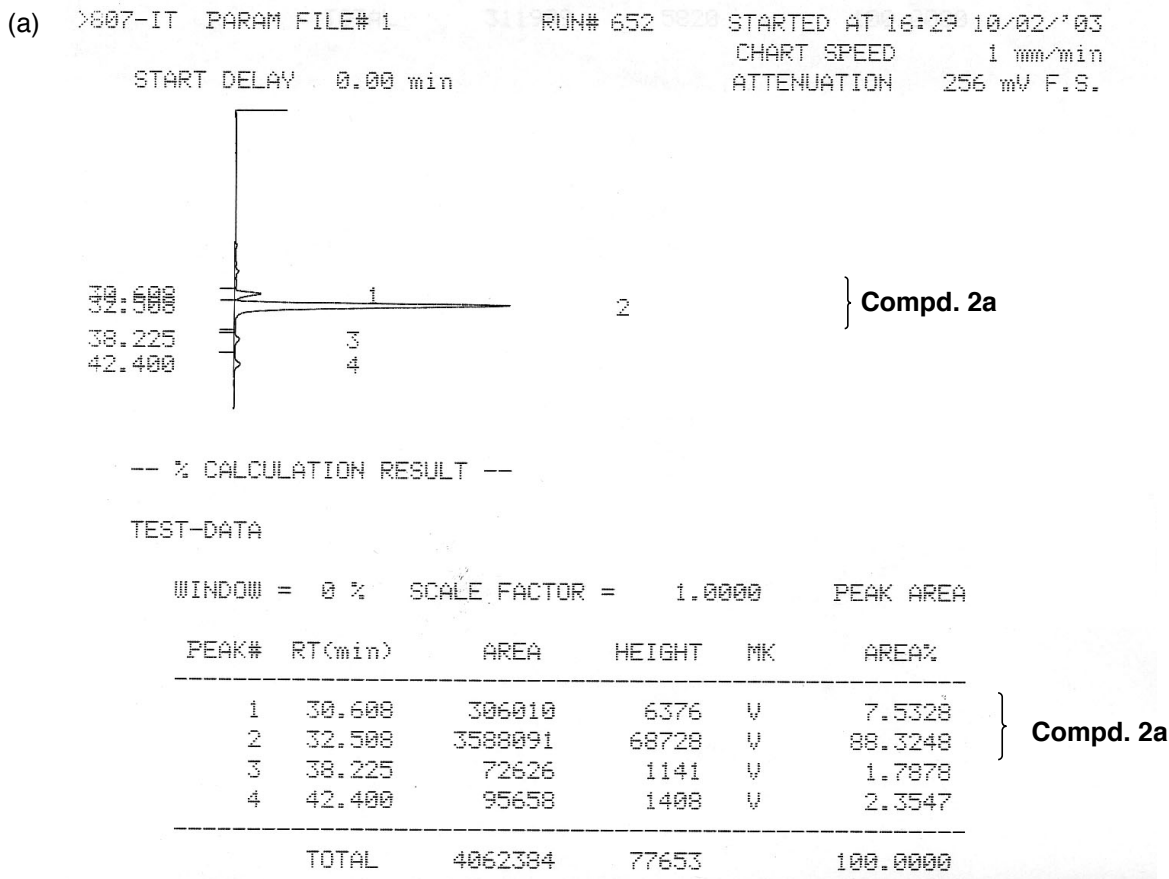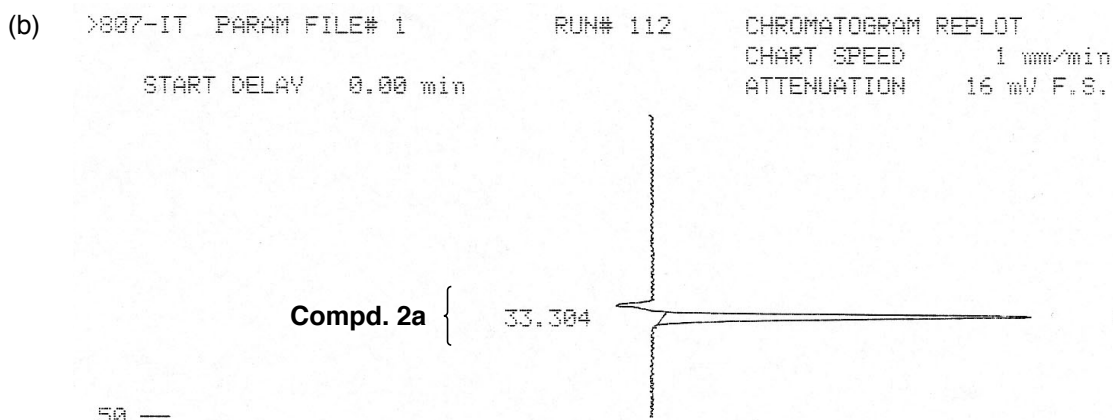

**Figure S6.** Traces of optically active **3** (67% ee) obtained by the reaction of **1c** with *n*-butyllithium at  $-60^{\circ}\text{C}$ . (a) Detector: UV-2075 (JASCO), wave-length: 254 nm; column: CHIRALCEL-OD (DAICEL); eluent: hexane: EtOH = 98 : 2; flow rate: 0.3 ml min<sup>-1</sup>; column temp.: 30.0°C. (b) Detector: CD-2095 (JASCO)

(a)

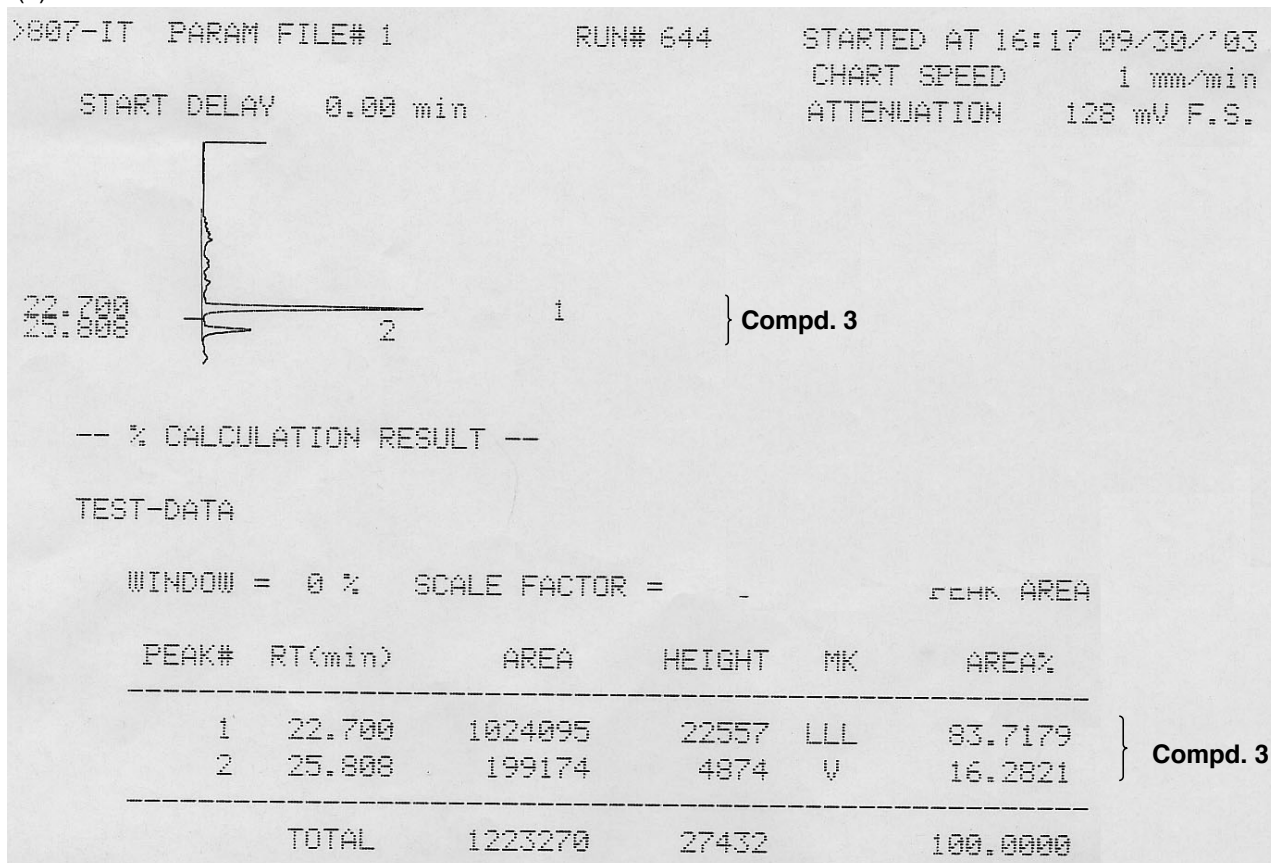

(b)

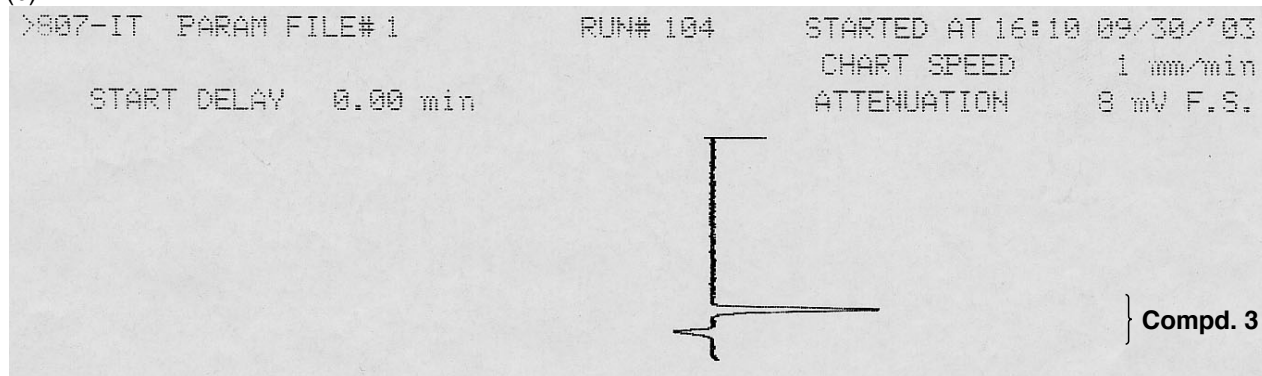

Supplement: b315729f.pdf [file b315729f.pdf]
